# Supplementary material for: Spinosin and 6‴-Feruloylspinosin protect the heart against acute myocardial ischemia and reperfusion in rats
Source: PubMed Central journal article supplement — Mol Med Rep. 2019 Sep 16;20(5):4253–61. doi: 10.3892/mmr.2019.10686 (PMC6797956; doi:10.3892/mmr.2019.10686), 2019-09-16

Figure S1. Electrocardiogram and TTC staining assay confirming the success of myocardial infarction model. (A) Rats were monitored by electrocardiogram during the whole procedures of surgery. ST segment elevations were observed after ischemia. (B) Represented TTC staining pictures were selected showing the white infarct area of ischemic heart. TTC, triphenyltetrazolium chloride; SP, Spinosin; FS, 6''-feruloylspinosin.

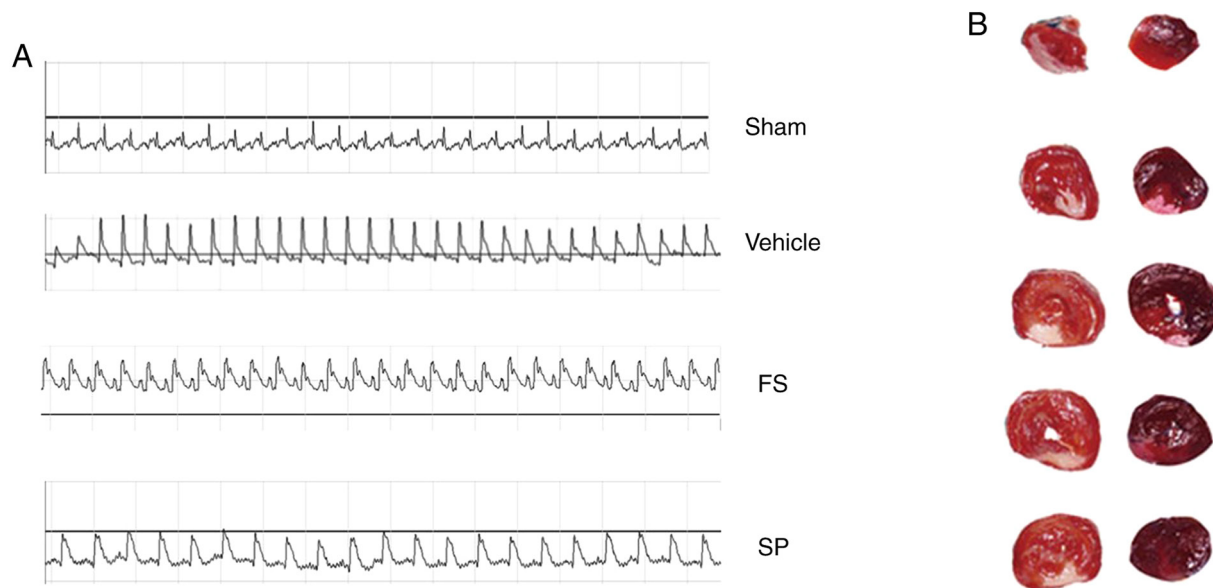

Supplement: Supplementary_Data.pdf [file Supplementary_Data.pdf]
